# Supplementary material
Source: Research Square preprint supplement (doi:10.21203/rs.3.rs-9234022/v1)
Supplement: Supplementary file 1 [file c88b4d181e75e73e39ffdc98.pdf]

**Supplementary Table 1**

Full gene expression profile of synaptic plasticity-related genes in F0 mice measured by RT<sup>2</sup> Profiler™ PCR Array (Qiagen). Significant genes ( $p \leq 0.05$ ) are highlighted in green, trending ( $p \leq 0.08$ ) in yellow, and non-significant ( $p > 0.08$ ) in white. Adjustment for multiple hypothesis testing was performed by estimating q values via the two-step Benjamini-Krieger-Yekutieli procedure, from which q values were derived. Genes with CT  $\geq 30$  (shown in grey) were excluded from the analysis.

| Gene          | Fold change | SEM   | p value | Log(2) vs mean ctrl | -Log(10) p value | q value |
|---------------|-------------|-------|---------|---------------------|------------------|---------|
| <i>Adam10</i> | 1.092       | 0.020 | 0.134   | 0.127               | 0.873            | 0.351   |
| <i>Adcy1</i>  | 0.882       | 0.128 | 0.394   | -0.181              | 0.405            | 0.567   |
| <i>Adcy8</i>  | 1.485       | 0.181 | 0.025   | 0.571               | 1.608            | 0.250   |
| <i>Akt1</i>   | 1.132       | 0.054 | 0.037   | 0.179               | 1.430            | 0.250   |
| <i>Arc</i>    | 0.797       | 0.083 | 0.053   | -0.327              | 1.280            | 0.265   |
| <i>Bdnf</i>   | 0.906       | 0.144 | 0.712   | -0.142              | 0.148            | 0.827   |
| <i>Camk2a</i> | 0.943       | 0.046 | 0.394   | -0.085              | 0.404            | 0.567   |
| <i>Camk2g</i> | 1.285       | 0.081 | 0.005   | 0.362               | 2.265            | 0.193   |
| <i>Cdh2</i>   | 1.230       | 0.090 | 0.040   | 0.299               | 1.397            | 0.250   |
| <i>Cebpb</i>  | 1.072       | 0.033 | 0.125   | 0.100               | 0.904            | 0.351   |
| <i>Cebpd</i>  | 1.046       | 0.053 | 0.632   | 0.066               | 0.199            | 0.777   |
| <i>Cnr1</i>   | 1.121       | 0.050 | 0.071   | 0.164               | 1.150            | 0.316   |
| <i>Creb1</i>  | 1.145       | 0.045 | 0.041   | 0.195               | 1.383            | 0.250   |
| <i>Creml</i>  | 0.946       | 0.039 | 0.505   | -0.081              | 0.297            | 0.676   |
| <i>Dlg4</i>   | 1.002       | 0.023 | 0.952   | 0.003               | 0.022            | 0.968   |
| <i>Egr1</i>   | 1.031       | 0.052 | 0.722   | 0.044               | 0.142            | 0.827   |
| <i>Egr2</i>   | 0.952       | 0.060 | 0.631   | -0.071              | 0.200            | 0.777   |
| <i>Egr3</i>   | 0.951       | 0.054 | 0.607   | -0.073              | 0.217            | 0.769   |
| <i>Egr4</i>   | 0.891       | 0.044 | 0.189   | -0.167              | 0.725            | 0.416   |
| <i>Ephb2</i>  | 1.110       | 0.060 | 0.135   | 0.151               | 0.871            | 0.351   |
| <i>Fos</i>    | 1.028       | 0.121 | 0.841   | 0.040               | 0.075            | 0.907   |

|               |       |       |       |        |       |       |
|---------------|-------|-------|-------|--------|-------|-------|
| <i>Gabra5</i> | 1.142 | 0.045 | 0.032 | 0.191  | 1.489 | 0.250 |
| <i>Gnai1</i>  | 1.050 | 0.011 | 0.222 | 0.071  | 0.654 | 0.438 |
| <i>Gria1</i>  | 1.064 | 0.057 | 0.293 | 0.090  | 0.533 | 0.497 |
| <i>Gria2</i>  | 1.076 | 0.041 | 0.172 | 0.105  | 0.764 | 0.395 |
| <i>Gria3</i>  | 1.063 | 0.025 | 0.146 | 0.088  | 0.835 | 0.355 |
| <i>Gria4</i>  | 1.003 | 0.039 | 0.954 | 0.004  | 0.020 | 0.968 |
| <i>Grin1</i>  | 1.081 | 0.033 | 0.092 | 0.113  | 1.037 | 0.325 |
| <i>Grin2a</i> | 1.091 | 0.049 | 0.137 | 0.126  | 0.862 | 0.351 |
| <i>Grin2b</i> | 1.086 | 0.027 | 0.510 | 0.120  | 0.292 | 0.676 |
| <i>Grin2c</i> | 1.013 | 0.049 | 0.844 | 0.018  | 0.074 | 0.907 |
| <i>Grin2d</i> | 1.061 | 0.055 | 0.532 | 0.085  | 0.274 | 0.695 |
| <i>Grip1</i>  | 1.185 | 0.030 | 0.001 | 0.244  | 3.273 | 0.045 |
| <i>Grm1</i>   | 1.095 | 0.041 | 0.077 | 0.130  | 1.116 | 0.325 |
| <i>Grm2</i>   | 1.423 | 0.110 | 0.013 | 0.509  | 1.893 | 0.217 |
| <i>Grm3</i>   | 1.134 | 0.052 | 0.140 | 0.182  | 0.853 | 0.351 |
| <i>Grm4</i>   | 1.194 | 0.074 | 0.102 | 0.256  | 0.990 | 0.347 |
| <i>Grm5</i>   | 1.160 | 0.043 | 0.217 | 0.214  | 0.663 | 0.438 |
| <i>Grm7</i>   | 0.923 | 0.063 | 0.333 | -0.116 | 0.478 | 0.543 |
| <i>Grm8</i>   | 1.163 | 0.074 | 0.086 | 0.218  | 1.065 | 0.325 |
| <i>Homer1</i> | 1.049 | 0.036 | 0.302 | 0.069  | 0.520 | 0.503 |
| <i>Igf1</i>   | 1.157 | 0.045 | 0.089 | 0.210  | 1.050 | 0.325 |
| <i>Inhba</i>  | 1.006 | 0.042 | 0.913 | 0.008  | 0.039 | 0.957 |
| <i>Jun</i>    | 0.950 | 0.059 | 0.451 | -0.075 | 0.347 | 0.627 |
| <i>Junb</i>   | 0.759 | 0.095 | 0.112 | -0.399 | 0.951 | 0.351 |
| <i>Kif17</i>  | 1.041 | 0.042 | 0.660 | 0.058  | 0.181 | 0.800 |
| <i>Kif10</i>  | 1.022 | 0.076 | 0.839 | 0.032  | 0.076 | 0.907 |
| <i>Mapk1</i>  | 1.057 | 0.016 | 0.066 | 0.079  | 1.178 | 0.313 |
| <i>Mmp9</i>   | 1.436 | 0.086 | 0.007 | 0.522  | 2.165 | 0.193 |
| <i>Ncam1</i>  | 1.122 | 0.043 | 0.230 | 0.167  | 0.639 | 0.443 |

|                 |       |       |       |        |       |       |
|-----------------|-------|-------|-------|--------|-------|-------|
| <i>Nfkb1</i>    | 1.088 | 0.024 | 0.022 | 0.122  | 1.661 | 0.250 |
| <i>Nfkbib</i>   | 0.768 | 0.060 | 0.348 | -0.381 | 0.458 | 0.547 |
| <i>Ngf</i>      | 1.224 | 0.129 | 0.201 | 0.291  | 0.697 | 0.416 |
| <i>Ngfr</i>     | 1.283 | 0.299 | 0.383 | 0.360  | 0.417 | 0.567 |
| <i>Nos1</i>     | 1.289 | 0.153 | 0.107 | 0.366  | 0.971 | 0.349 |
| <i>Nptx2</i>    | 1.266 | 0.070 | 0.032 | 0.340  | 1.498 | 0.250 |
| <i>Nr4a1</i>    | 0.894 | 0.016 | 0.161 | -0.161 | 0.793 | 0.379 |
| <i>Ntf3</i>     | 1.040 | 0.169 | 0.824 | 0.056  | 0.084 | 0.907 |
| <i>Ntf5</i>     | 1.008 | 0.119 | 0.959 | 0.011  | 0.018 | 0.968 |
| <i>Ntrk2</i>    | 1.056 | 0.023 | 0.140 | 0.078  | 0.854 | 0.351 |
| <i>Pcdh8</i>    | 1.074 | 0.041 | 0.340 | 0.103  | 0.469 | 0.544 |
| <i>Pick1</i>    | 1.093 | 0.027 | 0.022 | 0.129  | 1.653 | 0.250 |
| <i>Pim1</i>     | 1.070 | 0.071 | 0.378 | 0.098  | 0.423 | 0.567 |
| <i>Plat</i>     | 1.177 | 0.063 | 0.044 | 0.235  | 1.355 | 0.250 |
| <i>Plcg1</i>    | 1.245 | 0.045 | 0.011 | 0.316  | 1.976 | 0.217 |
| <i>Ppp1ca</i>   | 1.011 | 0.031 | 0.788 | 0.016  | 0.103 | 0.892 |
| <i>Ppp1cc</i>   | 0.862 | 0.061 | 0.379 | -0.214 | 0.422 | 0.567 |
| <i>Ppp1r14a</i> | 1.114 | 0.079 | 0.198 | 0.155  | 0.703 | 0.416 |
| <i>Ppp2ca</i>   | 1.040 | 0.024 | 0.251 | 0.056  | 0.601 | 0.452 |
| <i>Ppp3ca</i>   | 1.082 | 0.054 | 0.241 | 0.113  | 0.618 | 0.445 |
| <i>Prkca</i>    | 1.219 | 0.063 | 0.031 | 0.286  | 1.509 | 0.250 |
| <i>Prkcc</i>    | 1.126 | 0.042 | 0.092 | 0.172  | 1.039 | 0.325 |
| <i>Prkg1</i>    | 1.068 | 0.066 | 0.430 | 0.095  | 0.367 | 0.607 |
| <i>Rab3a</i>    | 1.015 | 0.025 | 0.681 | 0.021  | 0.167 | 0.814 |
| <i>Rela</i>     | 1.131 | 0.070 | 0.141 | 0.178  | 0.852 | 0.351 |
| <i>Reln</i>     | 1.119 | 0.070 | 0.285 | 0.162  | 0.545 | 0.494 |
| <i>Rgs2</i>     | 1.036 | 0.049 | 0.460 | 0.051  | 0.337 | 0.629 |
| <i>Rheb</i>     | 1.011 | 0.031 | 0.883 | 0.016  | 0.054 | 0.936 |
| <i>Sirt1</i>    | 1.068 | 0.055 | 0.275 | 0.094  | 0.561 | 0.486 |

|              |       |       |       |        |       |       |
|--------------|-------|-------|-------|--------|-------|-------|
| <i>Srf</i>   | 1.092 | 0.039 | 0.053 | 0.126  | 1.276 | 0.265 |
| <i>Synpo</i> | 1.094 | 0.054 | 0.240 | 0.130  | 0.620 | 0.445 |
| <i>Timp1</i> | 1.029 | 0.054 | 0.702 | 0.041  | 0.153 | 0.827 |
| <i>Tnf</i>   | 0.617 | 0.181 | 0.201 | -0.697 | 0.696 | 0.416 |
| <i>Ywhaq</i> | 0.924 | 0.062 | 0.584 | -0.114 | 0.233 | 0.751 |

## Supplementary Table 2

Full gene expression profile of synaptic plasticity-related genes in F1 mice measured by RT<sup>2</sup> Profiler™ PCR Array (Qiagen). Significant genes ( $p \leq 0.05$ ) are highlighted in green, trending ( $p \leq 0.08$ ) in yellow, and non-significant ( $p > 0.08$ ) in white. Adjustment for multiple hypothesis testing was performed by estimating q values via the two-step Benjamini-Krieger-Yekutieli procedure, from which q values were derived. Genes with CT  $\geq 30$  (shown in grey) were excluded from the analysis.

| Gene          | Fold change | SEM   | p value | Log(2) vs mean ctrl | -Log(10) p value | q value |
|---------------|-------------|-------|---------|---------------------|------------------|---------|
| <i>Adam10</i> | 0.932       | 0.031 | 0.103   | -0.102              | 0.988            | 0.479   |
| <i>Adcy1</i>  | 0.943       | 0.035 | 0.216   | -0.084              | 0.666            | 0.548   |
| <i>Adcy8</i>  | 0.718       | 0.049 | 0.018   | -0.477              | 1.737            | 0.219   |
| <i>Akt1</i>   | 0.939       | 0.021 | 0.213   | -0.092              | 0.672            | 0.548   |
| <i>Arc</i>    | 0.963       | 0.048 | 0.608   | -0.054              | 0.216            | 0.796   |
| <i>Bdnf</i>   | 0.813       | 0.054 | 0.073   | -0.299              | 1.139            | 0.418   |
| <i>Camk2a</i> | 1.059       | 0.064 | 0.508   | 0.083               | 0.294            | 0.722   |
| <i>Camk2g</i> | 0.901       | 0.048 | 0.114   | -0.151              | 0.945            | 0.497   |
| <i>Cdh2</i>   | 0.701       | 0.029 | 0.000   | -0.512              | 4.084            | 0.007   |
| <i>Cebpb</i>  | 0.964       | 0.011 | 0.248   | -0.053              | 0.606            | 0.548   |
| <i>Cebpd</i>  | 0.857       | 0.053 | 0.053   | -0.222              | 1.280            | 0.400   |
| <i>Cnr1</i>   | 0.984       | 0.037 | 0.768   | -0.024              | 0.115            | 0.847   |
| <i>Creb1</i>  | 0.964       | 0.014 | 0.255   | -0.054              | 0.593            | 0.548   |
| <i>Crem</i>   | 1.057       | 0.035 | 0.254   | 0.080               | 0.595            | 0.548   |
| <i>Dlg4</i>   | 0.972       | 0.019 | 0.307   | -0.041              | 0.513            | 0.599   |
| <i>Egr1</i>   | 0.985       | 0.038 | 0.746   | -0.021              | 0.127            | 0.845   |
| <i>Egr2</i>   | 1.137       | 0.105 | 0.282   | 0.185               | 0.550            | 0.563   |
| <i>Egr3</i>   | 0.880       | 0.048 | 0.090   | -0.184              | 1.048            | 0.442   |
| <i>Egr4</i>   | 1.174       | 0.071 | 0.066   | 0.231               | 1.184            | 0.418   |
| <i>Ephb2</i>  | 1.029       | 0.042 | 0.607   | 0.042               | 0.217            | 0.796   |
| <i>Fos</i>    | 0.891       | 0.081 | 0.273   | -0.166              | 0.565            | 0.557   |

|               |       |       |       |        |       |       |
|---------------|-------|-------|-------|--------|-------|-------|
| <i>Gabra5</i> | 0.935 | 0.028 | 0.192 | -0.097 | 0.717 | 0.548 |
| <i>Gnai1</i>  | 0.941 | 0.023 | 0.044 | -0.088 | 1.357 | 0.383 |
| <i>Gria1</i>  | 0.967 | 0.030 | 0.417 | -0.048 | 0.380 | 0.672 |
| <i>Gria2</i>  | 0.946 | 0.049 | 0.401 | -0.080 | 0.397 | 0.672 |
| <i>Gria3</i>  | 0.897 | 0.028 | 0.008 | -0.156 | 2.095 | 0.179 |
| <i>Gria4</i>  | 1.035 | 0.022 | 0.453 | 0.050  | 0.344 | 0.674 |
| <i>Grin1</i>  | 0.952 | 0.029 | 0.250 | -0.070 | 0.603 | 0.548 |
| <i>Grin2a</i> | 0.975 | 0.053 | 0.692 | -0.036 | 0.160 | 0.828 |
| <i>Grin2b</i> | 0.960 | 0.047 | 0.453 | -0.059 | 0.344 | 0.674 |
| <i>Grin2c</i> | 0.956 | 0.046 | 0.498 | -0.065 | 0.303 | 0.720 |
| <i>Grin2d</i> | 0.955 | 0.024 | 0.393 | -0.066 | 0.406 | 0.672 |
| <i>Grip1</i>  | 0.901 | 0.036 | 0.124 | -0.150 | 0.907 | 0.497 |
| <i>Grm1</i>   | 0.926 | 0.035 | 0.133 | -0.112 | 0.876 | 0.508 |
| <i>Grm2</i>   | 0.907 | 0.034 | 0.412 | -0.141 | 0.386 | 0.672 |
| <i>Grm3</i>   | 0.999 | 0.048 | 0.982 | -0.002 | 0.008 | 0.980 |
| <i>Grm4</i>   | 1.044 | 0.059 | 0.552 | 0.062  | 0.258 | 0.772 |
| <i>Grm5</i>   | 0.943 | 0.014 | 0.173 | -0.084 | 0.763 | 0.548 |
| <i>Grm7</i>   | 1.034 | 0.033 | 0.364 | 0.048  | 0.439 | 0.667 |
| <i>Grm8</i>   | 0.986 | 0.037 | 0.814 | -0.021 | 0.089 | 0.875 |
| <i>Homer1</i> | 0.918 | 0.019 | 0.013 | -0.124 | 1.894 | 0.179 |
| <i>Igf1</i>   | 1.081 | 0.060 | 0.379 | 0.112  | 0.422 | 0.667 |
| <i>Inhba</i>  | 0.992 | 0.067 | 0.942 | -0.011 | 0.026 | 0.953 |
| <i>Jun</i>    | 0.904 | 0.035 | 0.125 | -0.145 | 0.905 | 0.497 |
| <i>Junb</i>   | 1.213 | 0.135 | 0.234 | 0.279  | 0.631 | 0.548 |
| <i>Kif17</i>  | 1.047 | 0.051 | 0.449 | 0.066  | 0.348 | 0.674 |
| <i>Kif10</i>  | 1.024 | 0.099 | 0.878 | 0.034  | 0.059 | 0.915 |
| <i>Mapk1</i>  | 0.945 | 0.023 | 0.069 | -0.081 | 1.162 | 0.418 |
| <i>Mmp9</i>   | 1.061 | 0.103 | 0.642 | 0.085  | 0.193 | 0.796 |
| <i>Ncam1</i>  | 0.948 | 0.040 | 0.371 | -0.078 | 0.431 | 0.667 |

|                 |       |       |       |        |       |       |
|-----------------|-------|-------|-------|--------|-------|-------|
| <i>Nfkb1</i>    | 0.992 | 0.053 | 0.886 | -0.012 | 0.053 | 0.917 |
| <i>Nfkbib</i>   | 1.031 | 0.168 | 0.867 | 0.044  | 0.062 | 0.915 |
| <i>Ngf</i>      | 1.211 | 0.104 | 0.229 | 0.277  | 0.640 | 0.548 |
| <i>Ngfr</i>     | 0.985 | 0.162 | 0.943 | -0.023 | 0.025 | 0.953 |
| <i>Nos1</i>     | 0.863 | 0.051 | 0.211 | -0.213 | 0.676 | 0.548 |
| <i>Nptx2</i>    | 0.848 | 0.037 | 0.013 | -0.238 | 1.893 | 0.179 |
| <i>Nr4a1</i>    | 0.887 | 0.074 | 0.212 | -0.173 | 0.674 | 0.548 |
| <i>Ntf3</i>     | 1.042 | 0.100 | 0.721 | 0.060  | 0.142 | 0.840 |
| <i>Ntf5</i>     | 1.262 | 0.216 | 0.319 | 0.336  | 0.497 | 0.607 |
| <i>Ntrk2</i>    | 0.993 | 0.023 | 0.799 | -0.010 | 0.098 | 0.869 |
| <i>Pcdh8</i>    | 1.019 | 0.031 | 0.625 | 0.027  | 0.204 | 0.796 |
| <i>Pick1</i>    | 0.959 | 0.013 | 0.167 | -0.060 | 0.777 | 0.548 |
| <i>Pim1</i>     | 0.863 | 0.069 | 0.224 | -0.213 | 0.649 | 0.548 |
| <i>Plat</i>     | 0.973 | 0.050 | 0.646 | -0.040 | 0.190 | 0.796 |
| <i>Plcg1</i>    | 0.885 | 0.031 | 0.011 | -0.177 | 1.965 | 0.179 |
| <i>Ppp1ca</i>   | 0.911 | 0.035 | 0.080 | -0.134 | 1.098 | 0.418 |
| <i>Ppp1cc</i>   | 0.746 | 0.035 | 0.032 | -0.422 | 1.498 | 0.333 |
| <i>Ppp1r14a</i> | 0.949 | 0.066 | 0.600 | -0.075 | 0.222 | 0.796 |
| <i>Ppp2ca</i>   | 0.968 | 0.038 | 0.451 | -0.046 | 0.346 | 0.674 |
| <i>Ppp3ca</i>   | 0.971 | 0.047 | 0.638 | -0.042 | 0.195 | 0.796 |
| <i>Prkca</i>    | 0.948 | 0.044 | 0.382 | -0.077 | 0.418 | 0.667 |
| <i>Prkcc</i>    | 1.058 | 0.070 | 0.458 | 0.081  | 0.339 | 0.674 |
| <i>Prkg1</i>    | 0.981 | 0.050 | 0.761 | -0.028 | 0.118 | 0.847 |
| <i>Rab3a</i>    | 1.011 | 0.015 | 0.734 | 0.016  | 0.135 | 0.842 |
| <i>Rela</i>     | 0.874 | 0.019 | 0.013 | -0.195 | 1.904 | 0.179 |
| <i>Reln</i>     | 0.940 | 0.063 | 0.566 | -0.090 | 0.247 | 0.778 |
| <i>Rgs2</i>     | 0.908 | 0.062 | 0.212 | -0.139 | 0.673 | 0.548 |
| <i>Rheb</i>     | 0.976 | 0.054 | 0.710 | -0.035 | 0.149 | 0.838 |
| <i>Sirt1</i>    | 0.908 | 0.040 | 0.078 | -0.139 | 1.106 | 0.418 |

|              |       |       |       |        |       |       |
|--------------|-------|-------|-------|--------|-------|-------|
| <i>Srf</i>   | 0.924 | 0.019 | 0.046 | -0.114 | 1.341 | 0.383 |
| <i>Synpo</i> | 1.093 | 0.069 | 0.251 | 0.129  | 0.601 | 0.548 |
| <i>Timp1</i> | 1.095 | 0.064 | 0.266 | 0.131  | 0.576 | 0.556 |
| <i>Tnf</i>   | 1.186 | 0.368 | 0.672 | 0.246  | 0.173 | 0.816 |
| <i>Ywhaq</i> | 1.117 | 0.092 | 0.236 | 0.159  | 0.626 | 0.548 |

### Supplementary Table 3

Full list of the individual behavioral data for all F1 offspring shown in Figure 4. For clarity, the main figure depicts group mean  $\pm$  SEM, whereas this supplementary table reports the raw values for each animal individually.

Animals excluded from the final behavioral analysis due to abnormal exploratory behavior during the initial habituation phase are highlighted in grey (<5 % in one of the chambers). Animals selected for subsequent gene expression analysis via PCR array are highlighted in red.

| Animal ID | F0 Father | Group            | Time in social chamber [%] | Time in non-social chamber [%] | Time in social contact [%] | Time in non-social contact [%] |
|-----------|-----------|------------------|----------------------------|--------------------------------|----------------------------|--------------------------------|
| 1         | 1         | SFC <sup>-</sup> | 85.87                      | 1.40                           | 47.59                      | 0.00                           |
| 2         | 1         | SFC <sup>-</sup> | 52.03                      | 36.16                          | 24.69                      | 14.35                          |
| 3         | 2         | SFC <sup>+</sup> | 4.68                       | 62.98                          | 1.49                       | 8.36                           |
| 4         | 2         | SFC <sup>+</sup> | 54.74                      | 37.10                          | 34.75                      | 19.55                          |
| 5         | 2         | SFC <sup>+</sup> | 52.00                      | 32.03                          | 25.59                      | 8.79                           |
| 6         | 2         | SFC <sup>+</sup> | 43.32                      | 43.69                          | 26.42                      | 22.61                          |
| 7         | 2         | SFC <sup>+</sup> | 17.87                      | 62.76                          | 10.08                      | 22.44                          |
| 8         | 2         | SFC <sup>+</sup> | 38.88                      | 41.15                          | 22.12                      | 12.08                          |
| 9         | 3         | SFC <sup>-</sup> | 35.98                      | 41.56                          | 19.38                      | 18.88                          |
| 10        | 3         | SFC <sup>-</sup> | 34.77                      | 46.74                          | 17.12                      | 11.97                          |
| 11        | 3         | SFC <sup>-</sup> | 40.10                      | 45.95                          | 21.23                      | 24.00                          |
| 12        | 3         | SFC <sup>-</sup> | 54.36                      | 29.75                          | 28.52                      | 11.91                          |
| 13        | 4         | SFC <sup>+</sup> | 36.91                      | 39.36                          | 19.78                      | 15.99                          |
| 14        | 4         | SFC <sup>+</sup> | 45.66                      | 32.53                          | 15.07                      | 4.44                           |
| 15        | 4         | SFC <sup>+</sup> | 47.66                      | 40.96                          | 24.57                      | 13.94                          |
| 16        | 4         | SFC <sup>+</sup> | 55.38                      | 29.97                          | 29.06                      | 13.44                          |
| 17        | 4         | SFC <sup>+</sup> | 38.61                      | 41.34                          | 17.01                      | 14.85                          |
| 18        | 4         | SFC <sup>+</sup> | 37.48                      | 39.56                          | 17.73                      | 14.39                          |
| 19        | 4         | SFC <sup>+</sup> | 32.83                      | 44.13                          | 13.83                      | 22.16                          |
| 20        | 5         | SFC <sup>-</sup> | 40.58                      | 45.42                          | 17.34                      | 12.76                          |
| 21        | 5         | SFC <sup>-</sup> | 61.76                      | 22.50                          | 31.78                      | 2.20                           |
| 22        | 5         | SFC <sup>-</sup> | 39.73                      | 40.16                          | 19.30                      | 5.17                           |
| 23        | 5         | SFC <sup>-</sup> | 63.73                      | 13.96                          | 35.08                      | 10.20                          |
| 24        | 5         | SFC <sup>-</sup> | 32.18                      | 54.75                          | 14.78                      | 15.32                          |

|           |           |                        |              |              |              |              |
|-----------|-----------|------------------------|--------------|--------------|--------------|--------------|
| <b>25</b> | <b>5</b>  | <b>SFC<sup>-</sup></b> | <b>63.59</b> | <b>21.78</b> | <b>36.45</b> | <b>10.19</b> |
| <b>26</b> | 5         | SFC <sup>-</sup>       | 31.78        | 47.19        | 14.16        | 8.39         |
| <b>27</b> | 6         | SFC <sup>+</sup>       | 48.64        | 30.07        | 23.21        | 10.44        |
| <b>28</b> | 6         | SFC <sup>+</sup>       | 52.02        | 32.33        | 28.53        | 8.13         |
| <b>29</b> | 6         | SFC <sup>+</sup>       | 38.55        | 45.59        | 14.38        | 12.09        |
| <b>30</b> | 6         | SFC <sup>+</sup>       | 38.91        | 38.11        | 22.94        | 11.34        |
| <b>31</b> | 7         | SFC <sup>-</sup>       | 30.19        | 54.69        | 10.27        | 17.16        |
| <b>32</b> | 7         | SFC <sup>-</sup>       | 27.86        | 52.48        | 9.03         | 17.28        |
| <b>33</b> | 7         | SFC <sup>-</sup>       | 44.62        | 44.79        | 23.10        | 21.79        |
| <b>34</b> | 7         | SFC <sup>-</sup>       | 42.30        | 39.20        | 21.08        | 11.11        |
| <b>35</b> | 7         | SFC <sup>-</sup>       | 55.25        | 32.61        | 33.25        | 8.83         |
| <b>36</b> | 7         | SFC <sup>-</sup>       | 75.77        | 12.50        | 35.07        | 3.29         |
| <b>37</b> | 7         | SFC <sup>-</sup>       | 53.44        | 23.96        | 27.74        | 5.14         |
| <b>38</b> | <b>7</b>  | <b>SFC<sup>-</sup></b> | <b>65.77</b> | <b>25.06</b> | <b>35.79</b> | <b>7.29</b>  |
| <b>39</b> | 8         | SFC <sup>+</sup>       | 51.16        | 33.28        | 18.41        | 12.52        |
| <b>40</b> | 8         | SFC <sup>+</sup>       | 19.81        | 47.74        | 9.61         | 13.29        |
| <b>41</b> | 8         | SFC <sup>+</sup>       | 44.40        | 33.42        | 21.96        | 12.71        |
| <b>42</b> | 8         | SFC <sup>+</sup>       | 29.67        | 49.41        | 16.60        | 16.14        |
| <b>43</b> | 8         | SFC <sup>+</sup>       | 49.89        | 34.23        | 27.38        | 9.13         |
| <b>44</b> | <b>9</b>  | <b>SFC<sup>-</sup></b> | <b>53.50</b> | <b>36.03</b> | <b>30.25</b> | <b>13.31</b> |
| <b>45</b> | 9         | SFC <sup>-</sup>       | 36.10        | 43.24        | 19.06        | 18.00        |
| <b>46</b> | 9         | SFC <sup>-</sup>       | 44.05        | 27.86        | 25.00        | 11.64        |
| <b>47</b> | 9         | SFC <sup>-</sup>       | 81.15        | 10.50        | 54.58        | 4.87         |
| <b>48</b> | 9         | SFC <sup>-</sup>       | 49.41        | 25.22        | 29.47        | 6.34         |
| <b>49</b> | 9         | SFC <sup>-</sup>       | 34.10        | 47.57        | 17.45        | 13.63        |
| <b>50</b> | 10        | SFC <sup>+</sup>       | 31.17        | 35.41        | 14.10        | 11.38        |
| <b>51</b> | 10        | SFC <sup>+</sup>       | 52.37        | 27.19        | 29.83        | 9.92         |
| <b>52</b> | 10        | SFC <sup>+</sup>       | 78.68        | 5.51         | 40.80        | 2.13         |
| <b>53</b> | 10        | SFC <sup>+</sup>       | 42.87        | 41.13        | 14.13        | 14.53        |
| <b>54</b> | <b>10</b> | <b>SFC<sup>+</sup></b> | <b>34.40</b> | <b>46.01</b> | <b>12.13</b> | <b>11.45</b> |
| <b>55</b> | 10        | SFC <sup>+</sup>       | 48.44        | 25.18        | 18.35        | 1.89         |
| <b>56</b> | 10        | SFC <sup>+</sup>       | 40.83        | 17.38        | 18.60        | 3.70         |
| <b>57</b> | 10        | SFC <sup>+</sup>       | 34.30        | 47.03        | 15.05        | 14.75        |
| <b>58</b> | 10        | SFC <sup>+</sup>       | 47.57        | 30.79        | 22.26        | 11.28        |
| <b>59</b> | 10        | SFC <sup>+</sup>       | 44.55        | 33.90        | 17.98        | 10.75        |

|    |    |                  |       |       |       |       |
|----|----|------------------|-------|-------|-------|-------|
| 60 | 11 | SFC <sup>-</sup> | 36.10 | 43.57 | 19.12 | 18.61 |
| 61 | 11 | SFC <sup>-</sup> | 66.22 | 14.75 | 25.23 | 3.43  |
| 62 | 11 | SFC <sup>-</sup> | 39.14 | 42.82 | 18.21 | 13.34 |
| 63 | 12 | SFC <sup>+</sup> | 53.89 | 35.99 | 30.95 | 16.89 |
| 64 | 12 | SFC <sup>+</sup> | 40.04 | 43.26 | 14.41 | 13.89 |
| 65 | 12 | SFC <sup>+</sup> | 27.86 | 58.35 | 5.68  | 24.97 |
| 66 | 12 | SFC <sup>+</sup> | 52.82 | 24.43 | 23.88 | 14.15 |
| 67 | 13 | SFC <sup>-</sup> | 41.06 | 31.04 | 23.15 | 8.61  |
| 68 | 13 | SFC <sup>-</sup> | 55.95 | 26.08 | 26.10 | 7.89  |
| 69 | 13 | SFC <sup>-</sup> | 42.30 | 38.08 | 12.98 | 12.71 |
| 70 | 13 | SFC <sup>-</sup> | 20.15 | 57.67 | 5.80  | 11.27 |
| 71 | 13 | SFC <sup>-</sup> | 21.89 | 54.62 | 6.63  | 12.71 |
| 72 | 13 | SFC <sup>-</sup> | 38.32 | 41.79 | 12.70 | 19.03 |
| 73 | 13 | SFC <sup>-</sup> | 62.76 | 24.59 | 42.93 | 7.19  |
| 74 | 13 | SFC <sup>-</sup> | 54.63 | 32.47 | 26.81 | 10.24 |
| 75 | 14 | SFC <sup>+</sup> | 41.45 | 44.95 | 10.59 | 21.10 |
| 76 | 14 | SFC <sup>+</sup> | 47.92 | 42.19 | 18.83 | 20.11 |
| 77 | 14 | SFC <sup>+</sup> | 41.10 | 36.57 | 13.83 | 14.02 |
| 78 | 14 | SFC <sup>+</sup> | 35.73 | 36.34 | 11.90 | 14.18 |
| 79 | 14 | SFC <sup>+</sup> | 58.43 | 11.75 | 22.12 | 3.72  |
| 80 | 14 | SFC <sup>+</sup> | 64.71 | 19.48 | 18.87 | 1.60  |
| 81 | 15 | SFC <sup>-</sup> | 67.24 | 16.50 | 25.69 | 3.67  |
| 82 | 15 | SFC <sup>-</sup> | 37.29 | 45.83 | 18.90 | 16.21 |
| 83 | 15 | SFC <sup>-</sup> | 38.23 | 36.50 | 16.26 | 11.79 |
| 84 | 15 | SFC <sup>-</sup> | 13.31 | 47.29 | 6.88  | 20.03 |
| 85 | 15 | SFC <sup>-</sup> | 52.92 | 30.02 | 24.36 | 11.51 |
| 86 | 15 | SFC <sup>-</sup> | 11.20 | 50.68 | 1.94  | 12.35 |
| 87 | 15 | SFC <sup>-</sup> | 42.84 | 34.86 | 21.05 | 15.92 |
| 88 | 16 | SFC <sup>+</sup> | 14.95 | 65.78 | 6.47  | 33.86 |
| 89 | 16 | SFC <sup>+</sup> | 51.47 | 28.32 | 18.98 | 10.37 |
| 90 | 16 | SFC <sup>+</sup> | 31.87 | 55.74 | 9.78  | 23.82 |
| 91 | 16 | SFC <sup>+</sup> | 39.12 | 44.62 | 21.49 | 13.99 |
| 92 | 16 | SFC <sup>+</sup> | 55.02 | 33.83 | 21.03 | 16.60 |
| 93 | 16 | SFC <sup>+</sup> | 37.01 | 53.10 | 18.19 | 20.36 |
| 94 | 16 | SFC <sup>+</sup> | 41.87 | 37.14 | 13.92 | 19.05 |

|     |    |                  |       |       |       |       |
|-----|----|------------------|-------|-------|-------|-------|
| 95  | 16 | SFC <sup>+</sup> | 47.18 | 37.52 | 21.27 | 22.58 |
| 96  | 16 | SFC <sup>+</sup> | 29.97 | 54.97 | 11.13 | 23.45 |
| 97  | 17 | SFC <sup>-</sup> | 54.17 | 24.43 | 25.38 | 3.95  |
| 98  | 17 | SFC <sup>-</sup> | 24.11 | 38.06 | 7.96  | 12.07 |
| 99  | 17 | SFC <sup>-</sup> | 29.62 | 45.06 | 7.62  | 13.69 |
| 100 | 17 | SFC <sup>-</sup> | 18.15 | 52.02 | 2.82  | 23.34 |
| 101 | 17 | SFC <sup>-</sup> | 42.82 | 47.58 | 19.33 | 15.96 |
| 102 | 17 | SFC <sup>-</sup> | 31.67 | 36.71 | 8.42  | 9.15  |
| 103 | 17 | SFC <sup>-</sup> | 43.38 | 35.40 | 18.85 | 11.12 |
| 104 | 17 | SFC <sup>-</sup> | 44.23 | 38.17 | 14.61 | 7.93  |
| 105 | 17 | SFC <sup>-</sup> | 45.14 | 37.07 | 12.83 | 11.17 |
| 106 | 18 | SFC <sup>+</sup> | 41.28 | 44.85 | 23.47 | 17.57 |
| 107 | 18 | SFC <sup>+</sup> | 41.15 | 38.59 | 22.69 | 17.43 |
| 108 | 18 | SFC <sup>+</sup> | 27.54 | 55.48 | 11.00 | 17.18 |
| 109 | 18 | SFC <sup>+</sup> | 62.54 | 25.16 | 38.97 | 13.73 |
| 110 | 18 | SFC <sup>+</sup> | 77.45 | 14.21 | 48.47 | 4.53  |
| 111 | 18 | SFC <sup>+</sup> | 22.03 | 70.83 | 15.72 | 43.77 |
| 112 | 18 | SFC <sup>+</sup> | 60.24 | 26.54 | 33.14 | 9.01  |
| 113 | 18 | SFC <sup>+</sup> | 46.94 | 39.22 | 25.35 | 14.60 |
| 114 | 18 | SFC <sup>+</sup> | 35.68 | 46.87 | 19.77 | 13.14 |
| 115 | 18 | SFC <sup>+</sup> | 41.67 | 37.85 | 22.16 | 16.69 |
| 116 | 18 | SFC <sup>+</sup> | 52.82 | 14.79 | 16.83 | 2.63  |
| 117 | 19 | SFC <sup>-</sup> | 48.26 | 28.98 | 17.82 | 9.30  |
| 118 | 19 | SFC <sup>-</sup> | 56.17 | 2.20  | 18.75 | 0.11  |
| 119 | 19 | SFC <sup>-</sup> | 46.26 | 41.32 | 14.33 | 11.21 |
| 120 | 19 | SFC <sup>-</sup> | 21.64 | 46.56 | 4.14  | 8.36  |
| 121 | 19 | SFC <sup>-</sup> | 30.98 | 36.41 | 17.29 | 9.64  |
| 122 | 19 | SFC <sup>-</sup> | 49.18 | 31.01 | 18.92 | 9.65  |
| 123 | 19 | SFC <sup>-</sup> | 55.33 | 16.46 | 16.37 | 2.13  |
| 124 | 19 | SFC <sup>-</sup> | 41.52 | 37.00 | 17.36 | 12.18 |
| 125 | 19 | SFC <sup>-</sup> | 33.48 | 38.26 | 9.46  | 15.03 |
| 126 | 19 | SFC <sup>-</sup> | 28.66 | 53.50 | 9.85  | 16.85 |
| 127 | 20 | SFC <sup>+</sup> | 44.63 | 39.87 | 23.19 | 14.37 |
| 128 | 20 | SFC <sup>+</sup> | 17.50 | 55.32 | 6.17  | 16.49 |
| 129 | 20 | SFC <sup>+</sup> | 50.81 | 39.23 | 27.74 | 19.90 |

|            |    |                  |       |       |       |       |
|------------|----|------------------|-------|-------|-------|-------|
| <b>130</b> | 20 | SFC <sup>+</sup> | 45.09 | 28.79 | 10.94 | 6.34  |
| <b>131</b> | 20 | SFC <sup>+</sup> | 42.19 | 46.17 | 24.34 | 24.43 |
| <b>132</b> | 20 | SFC <sup>+</sup> | 2.88  | 81.55 | 0.80  | 33.50 |
| <b>133</b> | 21 | SFC <sup>-</sup> | 28.20 | 53.08 | 14.54 | 25.31 |
| <b>134</b> | 21 | SFC <sup>-</sup> | 34.10 | 52.68 | 18.51 | 14.99 |
| <b>135</b> | 21 | SFC <sup>-</sup> | 0.00  | 96.19 | 0.00  | 40.57 |
| <b>136</b> | 21 | SFC <sup>-</sup> | 20.59 | 59.01 | 7.15  | 17.04 |
| <b>137</b> | 21 | SFC <sup>-</sup> | 64.95 | 23.00 | 37.13 | 12.72 |
| <b>138</b> | 22 | SFC <sup>+</sup> | 90.95 | 0.00  | 35.32 | 0.00  |
| <b>139</b> | 22 | SFC <sup>+</sup> | 20.29 | 63.02 | 9.19  | 21.73 |
| <b>140</b> | 22 | SFC <sup>+</sup> | 29.14 | 51.23 | 7.49  | 21.21 |
| <b>141</b> | 22 | SFC <sup>+</sup> | 12.50 | 64.41 | 4.35  | 25.79 |
| <b>142</b> | 22 | SFC <sup>+</sup> | 46.91 | 38.69 | 24.16 | 23.80 |
| <b>143</b> | 22 | SFC <sup>+</sup> | 36.79 | 26.35 | 5.16  | 1.78  |
| <b>144</b> | 22 | SFC <sup>+</sup> | 51.95 | 33.46 | 24.70 | 15.40 |
| <b>145</b> | 22 | SFC <sup>+</sup> | 96.02 | 0.31  | 57.67 | 0.06  |
| <b>146</b> | 22 | SFC <sup>+</sup> | 45.12 | 41.18 | 27.37 | 18.24 |
| <b>147</b> | 23 | SFC <sup>-</sup> | 43.67 | 45.82 | 19.10 | 17.91 |
| <b>148</b> | 23 | SFC <sup>-</sup> | 40.52 | 50.12 | 23.61 | 20.99 |
| <b>149</b> | 23 | SFC <sup>-</sup> | 36.89 | 35.25 | 8.16  | 15.53 |
| <b>150</b> | 23 | SFC <sup>-</sup> | 40.02 | 45.23 | 36.16 | 2.88  |
| <b>151</b> | 23 | SFC <sup>-</sup> | 35.54 | 43.01 | 10.60 | 12.31 |
| <b>152</b> | 24 | SFC <sup>+</sup> | 51.80 | 32.06 | 27.35 | 16.00 |
| <b>153</b> | 24 | SFC <sup>+</sup> | 19.39 | 55.03 | 5.63  | 16.97 |
| <b>154</b> | 24 | SFC <sup>+</sup> | 67.42 | 19.09 | 35.54 | 5.91  |
| <b>155</b> | 24 | SFC <sup>+</sup> | 54.52 | 25.34 | 16.04 | 14.91 |
| <b>156</b> | 24 | SFC <sup>+</sup> | 75.71 | 15.61 | 42.10 | 4.73  |
| <b>157</b> | 24 | SFC <sup>+</sup> | 37.72 | 47.95 | 19.84 | 16.70 |
| <b>158</b> | 24 | SFC <sup>+</sup> | 60.25 | 15.49 | 28.88 | 3.69  |
| <b>159</b> | 24 | SFC <sup>+</sup> | 59.89 | 22.28 | 30.00 | 12.56 |
| <b>160</b> | 24 | SFC <sup>+</sup> | 47.56 | 39.17 | 24.69 | 24.11 |
| <b>161</b> | 24 | SFC <sup>+</sup> | 45.00 | 39.51 | 16.39 | 13.37 |
